# Supplementary material for: A Systematic Inflammation-based Model in Advanced Pancreatic Ductal Adenocarcinoma
Source: PubMed Central journal article supplement (PMC6856880; doi:10.7150/jca.30561), 2019-10-22
Supplement: jcav10p6673s1.pdf [file jcav10p6673s1.pdf]

## Supplement materials

Table S1. Baseline characteristics of patients with advanced PDAC

| Valuables                 | Category       | Training cohort    | Validation cohort  |
|---------------------------|----------------|--------------------|--------------------|
| Gender                    | Male           | 97 (66.0%)         | 74 (56.1%)         |
|                           | Female         | 50 (34.0%)         | 58 (43.9%)         |
| Age                       | Median (Range) | 60 (34-84)         | 64 (36-85)         |
|                           | 0              | 14 (9.5%)          | 16 (12.1%)         |
| ECOG PS                   | 1              | 110 (74.8%)        | 47 (35.6%)         |
|                           | 2              | 23 (15.6%)         | 69 (52.3%)         |
| Primary tumor location    | Head and neck  | 61 (41.5%)         | 63 (47.7%)         |
|                           | Body and tail  | 86 (58.5%)         | 69 (52.3%)         |
| Distant metastasis        | No             | 43 (29.3%)         | 17 (12.9%)         |
|                           | Yes            | 104 (70.7%)        | 115 (87.1%)        |
| CRP                       | Median (Range) | 4.0 (0.2-178.0)    | 3.5 (0.1-185.0)    |
| Albumin                   | Median (Range) | 38.7 (26.1-48.4)   | 37.0 (19.5-53.4)   |
| ALC (*10 <sup>9</sup> /L) | Median (Range) | 1.30 (0.29-4.87)   | 1.37 (0.43-3.74)   |
| AMC (*10 <sup>9</sup> /L) | Median (Range) | 0.46 (0.10-1.62)   | 0.40 (0.01-3.50)   |
| ANC (*10 <sup>9</sup> /L) | Median (Range) | 3.74 (1.01-14.07)  | 4.10 (0.96-26.3)   |
| PLT (*10 <sup>9</sup> /L) | Median (Range) | 178.0 (37.0-641.0) | 185.0 (17.0-763.0) |
| CA19-9 (U/ml)             | Median (Range) | 474.0 (0.6-2084.0) | 900.5 (0.1-2068.0) |
| CEA (ng/ml)               | Median (Range) | 7.4 (0.4-1065.0)   | 5.2 (0.6-1037.0)   |
| Hemoglobin (g/L)          | Median (Range) | 121 (75-168)       | 120 (73-153)       |

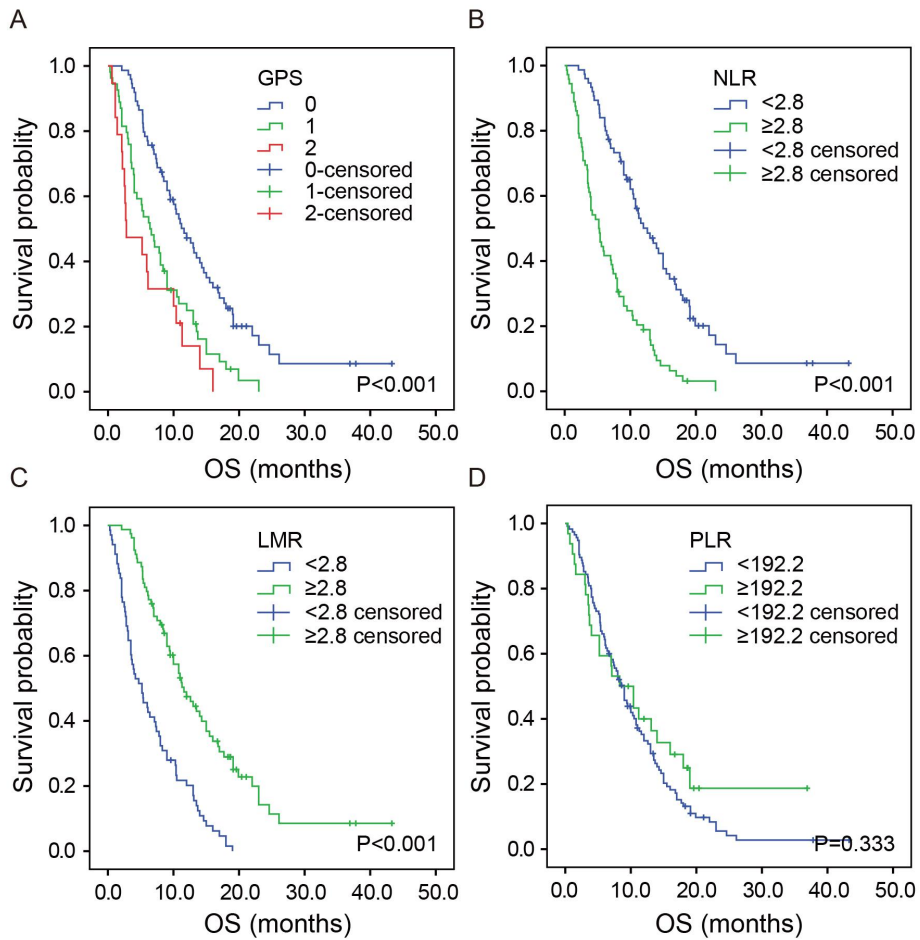

**Figure S1.** Kaplan-Meier estimates of overall survival according to GPS (A), NLR (B) LMR (C) and PLR (D).

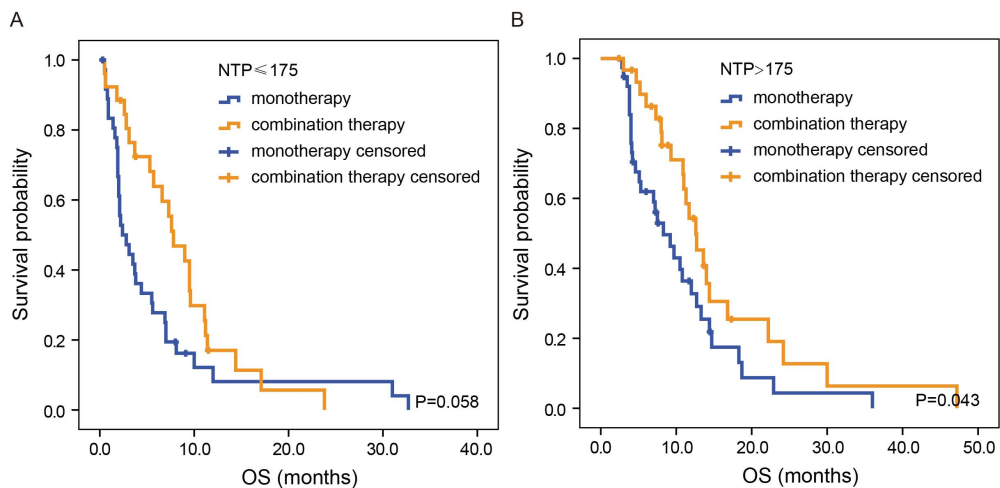

**Figure S2.** Kaplan-Meier analysis according to the chemotherapy regimens in the validation cohort. Kaplan-Meier analysis based on the chemotherapy regimens in the high-risk group (A) and low-risk group (B).
